# Supplementary material for: Na7[SbW6O24]: a new type of turn-off luminescence humidity sensor based on a lanthanide-free polyoxometalate
Source: Royal Society of Chemistry journal article supplement (doi:10.1039/d3tc03604a), 2023-12-21
Supplement: d3tc03604a1.pdf [file d3tc03604a1.pdf]

## Na<sub>7</sub>[SbW<sub>6</sub>O<sub>24</sub>]: a new type of turn-off luminescence humidity sensor based on a lanthanide-free polyoxometalate

Aurély Bagghi,<sup>a</sup> Philippe Deniard,<sup>a</sup> Yohann Cartigny,<sup>b\*</sup> and Rémi Dessapt<sup>a\*</sup>

<sup>a</sup> Nantes Université, CNRS, Institut des Matériaux de Nantes Jean Rouxel, IMN, F-44000 Nantes, France

<sup>b</sup> Univ Rouen Normandie, Normandie Univ, SMS, UR 3233, F-76000 Rouen, France, France.

### Electronic Supporting Information

#### Table of contents:

|                                                                                                                                                                                                                                                                                                                                          |    |
|------------------------------------------------------------------------------------------------------------------------------------------------------------------------------------------------------------------------------------------------------------------------------------------------------------------------------------------|----|
| <b>Fig. S1</b> Comparison between PXRD patterns of NaSbW <sub>6</sub> ·10H <sub>2</sub> O obtained (a) by thermally dehydrating NaSbW <sub>6</sub> ·16H <sub>2</sub> O at 50 °C overnight (blue line), and (b) by stirring the powder of NaSbW <sub>6</sub> ·16H <sub>2</sub> O in acetone overnight at room temperature (red line)..... | 2  |
| <b>Fig. S2</b> TGA (black line) and DSC (blue line) curves of NaSbW <sub>6</sub> ·10H <sub>2</sub> O.....                                                                                                                                                                                                                                | 3  |
| <b>Table S1</b> Atom positions, site occupation fractions and atomic displacement parameters for NaSbW <sub>6</sub> ·10H <sub>2</sub> O at 30°C.....                                                                                                                                                                                     | 4  |
| <b>Fig. S3</b> Top: Water molecules network around the [SbW <sub>6</sub> O <sub>24</sub> ] <sup>7-</sup> unit in NaSbW <sub>6</sub> ·16H <sub>2</sub> O. Bottom: Structural similarities between NaSbW <sub>6</sub> ·16H <sub>2</sub> O (left), and NaSbW <sub>6</sub> ·10H <sub>2</sub> O (right). .....                                | 5  |
| <b>Fig. S4</b> Comparison between PXRD patterns of NaSbW <sub>6</sub> ·16H <sub>2</sub> O exposed at 0%-5% RH for 4h (black line), NaSbW <sub>6</sub> (red line), and NaSbW <sub>6</sub> ·4H <sub>2</sub> O (blue line).....                                                                                                             | 6  |
| <b>Fig. S5</b> Room-temperature absorption spectra of NaSbW <sub>6</sub> ·16H <sub>2</sub> O, NaSbW <sub>6</sub> ·10H <sub>2</sub> O, NaSbW <sub>6</sub> ·4H <sub>2</sub> O and NaSbW <sub>6</sub> .....                                                                                                                                 | 7  |
| <b>Fig. S6</b> CIE chromaticity diagrams and chromaticity coordinates of NaSbW <sub>6</sub> ·10H <sub>2</sub> O, and NaSbW <sub>6</sub> ·4H <sub>2</sub> O, compared with those previously reported for NaSbW <sub>6</sub> ·16H <sub>2</sub> O, and NaSbW <sub>6</sub> .....                                                             | 8  |
| <b>Fig. S7</b> Room-temperature photoluminescence decay curves (λ <sub>ex</sub> = 254 nm) monitored at 513 nm for NaSbW <sub>6</sub> ·10H <sub>2</sub> O (■) and NaSbW <sub>6</sub> ·4H <sub>2</sub> O (●).....                                                                                                                          | 9  |
| <b>Fig. S8</b> Room-temperature PL spectra (recorded upon excitation at 254 nm) of NaSbW <sub>6</sub> at different RH levels compared with that of the NaSbW <sub>6</sub> ·16H <sub>2</sub> O reference.....                                                                                                                             | 10 |
| <b>Table S2</b> Crystallographic data of NaSbW <sub>6</sub> ·16H <sub>2</sub> O, NaSbW <sub>6</sub> ·10H <sub>2</sub> O, and NaSbW <sub>6</sub> .....                                                                                                                                                                                    | 11 |

**Fig. S1** Comparison between PXRD patterns of  $\text{NaSbW}_6 \cdot 10\text{H}_2\text{O}$  obtained (a) by thermally dehydrating  $\text{NaSbW}_6 \cdot 16\text{H}_2\text{O}$  at 50 °C overnight (blue line), and (b) by stirring the powder of  $\text{NaSbW}_6 \cdot 16\text{H}_2\text{O}$  in acetone overnight at room temperature (red line).

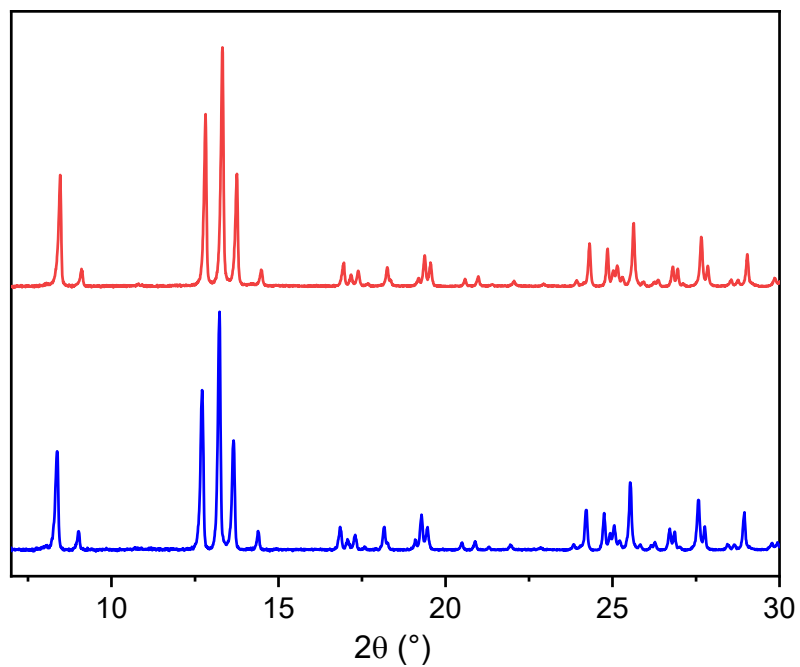

**Fig. S2** TGA (black line) and DSC (blue line) curves of  $\text{NaSbW}_6 \cdot 10\text{H}_2\text{O}$ .

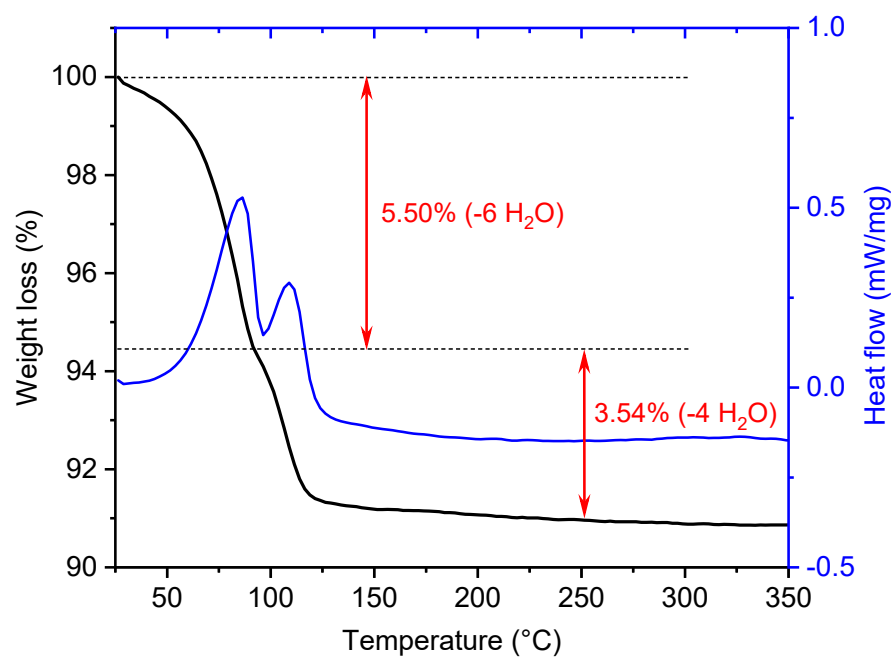

**Table S1** atom positions, site occupation fractions and atomic displacement parameters for **NaSbW<sub>6</sub>·10H<sub>2</sub>O** at 30°C. a, b, and c stand for oxygen atoms linked by  $C_{3i}$  symmetry. Atomic displacement parameters are constrained to be equal for each atom type.

| S.G. $P\bar{1}$ , a(Å) = 7.3865(1), b(Å) = 10.2513(1), c(Å) = 11.3135(2), $\alpha(^{\circ}) = 73.9061(11)$ ,<br>$\beta(^{\circ}) = 71.5584(10)$ , $\gamma(^{\circ}) = 76.483(1)$ , $R_{\text{Bragg}} = 3.60$ , GOF = 1.31, $R_{\text{wp}} = 11.09$ |            |           |              |     |         |                                    |
|----------------------------------------------------------------------------------------------------------------------------------------------------------------------------------------------------------------------------------------------------|------------|-----------|--------------|-----|---------|------------------------------------|
| atom                                                                                                                                                                                                                                               | x          | y         | z            | SOF | Wyckoff | $U_{\text{iso}}$ (Å <sup>2</sup> ) |
| Na1                                                                                                                                                                                                                                                | 0.217(3)   | -0.697(2) | 0.2045(18)   | 1   | 2i      | 0.004(3)                           |
| Na2                                                                                                                                                                                                                                                | -0.405(3)  | -0.430(2) | 0.578(2)     | 1   | 2i      | 0.004                              |
| Na3                                                                                                                                                                                                                                                | 0.548(3)   | -0.438(2) | 0.1176(18)   | 1   | 2i      | 0.004                              |
| Na4                                                                                                                                                                                                                                                | 0          | 0         | 0.5          | 1   | 1b      | 0.004                              |
| Ow1                                                                                                                                                                                                                                                | 1.224(4)   | 0.044(3)  | 1.290(3)     | 1   | 2i      | 0.0263(15)                         |
| Ow2                                                                                                                                                                                                                                                | -0.245(4)  | -0.554(3) | 0.397(3)     | 1   | 2i      | 0.0263                             |
| Ow3                                                                                                                                                                                                                                                | 0.582(4)   | -0.203(3) | -0.022(3)    | 1   | 2i      | 0.0263                             |
| Ow4                                                                                                                                                                                                                                                | 0.079(5)   | -0.610(4) | 0.397(3)     | 1   | 2i      | 0.0263                             |
| Ow5                                                                                                                                                                                                                                                | 0.370(5)   | -0.372(3) | 0.300(3)     | 1   | 2i      | 0.0263                             |
| O1a                                                                                                                                                                                                                                                | -0.164(3)  | -0.167(3) | 0.0986(18)   | 1   | 2i      | 0.0263                             |
| O1b                                                                                                                                                                                                                                                | -0.048     | 0.295     | -0.2413      | 1   | 2i      | 0.0263                             |
| O1c                                                                                                                                                                                                                                                | 0.262      | -0.479    | 0.0692       | 1   | 2i      | 0.0263                             |
| O2a                                                                                                                                                                                                                                                | -0.146(3)  | -0.443(3) | 0.1414(18)   | 1   | 2i      | 0.0263                             |
| O2b                                                                                                                                                                                                                                                | 0.221      | -0.174    | -0.041       | 1   | 2i      | 0.0263                             |
| O2c                                                                                                                                                                                                                                                | -0.022     | 0.299     | 0.0996       | 1   | 2i      | 0.0263                             |
| O3a                                                                                                                                                                                                                                                | 0.166(3)   | -0.184(3) | -0.3724(18)  | 1   | 2i      | 0.0263                             |
| O3b                                                                                                                                                                                                                                                | 0.435      | -0.308    | -0.2285      | 1   | 2i      | 0.0263                             |
| O3c                                                                                                                                                                                                                                                | 0.006      | 0.012     | -0.195       | 1   | 2i      | 0.0263                             |
| O4a                                                                                                                                                                                                                                                | -0.365(3)  | 0.024(3)  | 0.283(2)     | 1   | 2i      | 0.0263                             |
| O4b                                                                                                                                                                                                                                                | 0.373      | 0.272     | -0.373       | 1   | 2i      | 0.0263                             |
| O4c                                                                                                                                                                                                                                                | 0.115      | 0.159     | -0.439       | 1   | 2i      | 0.0263                             |
| W1                                                                                                                                                                                                                                                 | 0.1790(4)  | 0.1534(2) | -0.29748(16) | 1   | 2i      | 0.0183(3)                          |
| W2                                                                                                                                                                                                                                                 | -0.0382(4) | 0.3364(4) | -0.08062(16) | 1   | 2i      | 0.0183                             |
| W3                                                                                                                                                                                                                                                 | -0.2197(4) | 0.1832(2) | 0.2165(2)    | 1   | 2i      | 0.0183                             |
| Sb1                                                                                                                                                                                                                                                | 0          | 0         | 0            | -1  | 1a      | 0.010(2)                           |

**Fig. S3** Top: Water molecules network around the  $[\text{SbW}_6\text{O}_{24}]^{7-}$  unit in  $\text{NaSbW}_6\cdot 16\text{H}_2\text{O}$ . Bottom: Structural similarities between  $\text{NaSbW}_6\cdot 16\text{H}_2\text{O}$  (left), and  $\text{NaSbW}_6\cdot 10\text{H}_2\text{O}$  (right) (grey octahedra:  $\text{WO}_6$ , pink octahedra:  $\text{SbO}_6$ , green octahedra:  $\text{NaO}_6$ , orange spheres: oxygen of  $[\text{SbW}_6\text{O}_{24}]^{7-}$ , blue sphere: oxygen of water molecules. H-bonding interactions are displayed as blue dotted lines between oxygen atoms.

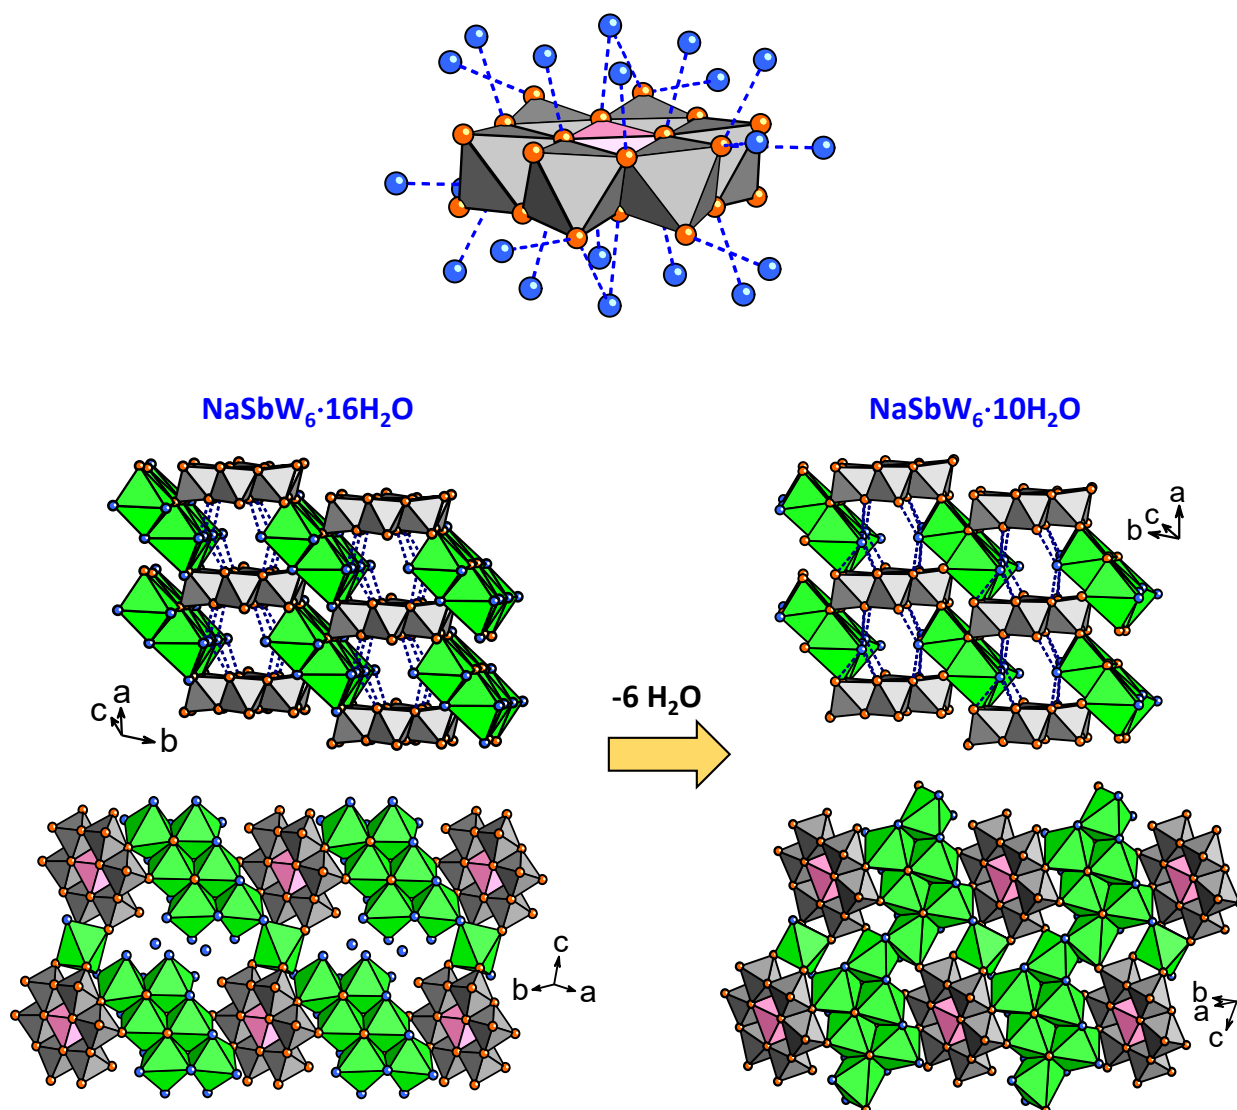

**Fig. S4** Comparison between PXRD patterns of  $\text{NaSbW}_6 \cdot 16\text{H}_2\text{O}$  exposed at 0%-5% RH for 4h (black line),  $\text{NaSbW}_6$  (red line), and  $\text{NaSbW}_6 \cdot 4\text{H}_2\text{O}$  (blue line).

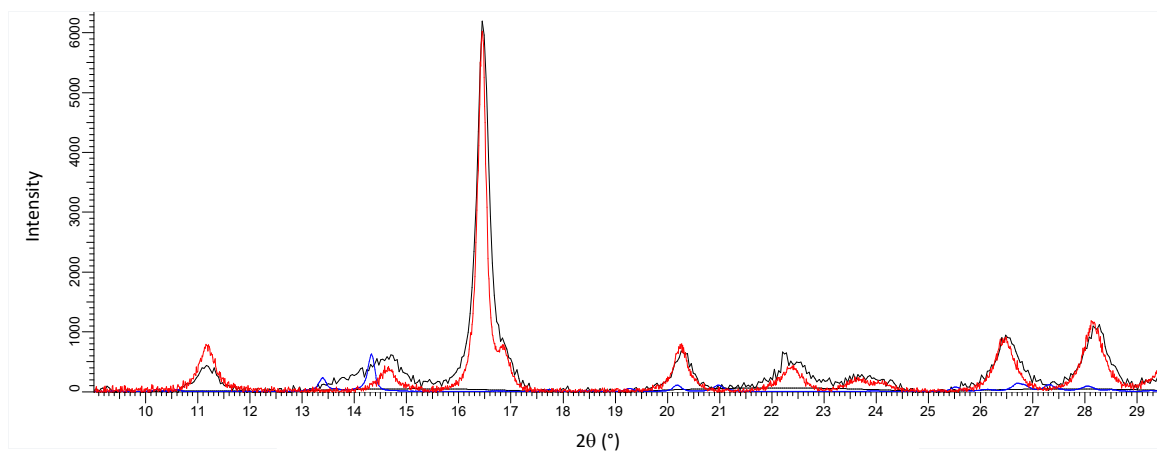

**Fig. S5** Room-temperature absorption spectra of  $\text{NaSbW}_6 \cdot 16\text{H}_2\text{O}$ ,  $\text{NaSbW}_6 \cdot 10\text{H}_2\text{O}$ ,  $\text{NaSbW}_6 \cdot 4\text{H}_2\text{O}$ , and  $\text{NaSbW}_6$ .

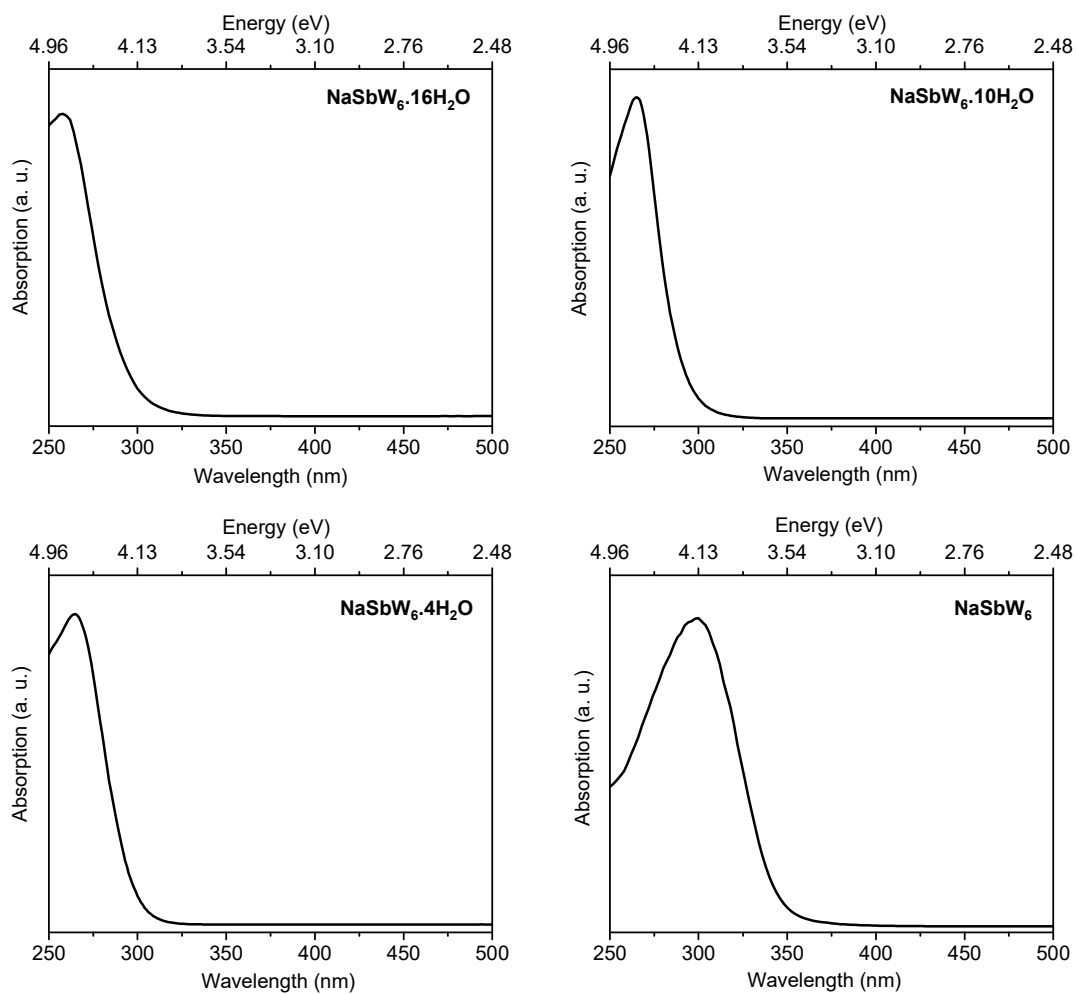

**Fig. S6** CIE chromaticity diagrams and chromaticity coordinates of  $\text{NaSbW}_6 \cdot 10\text{H}_2\text{O}$ , and  $\text{NaSbW}_6 \cdot 4\text{H}_2\text{O}$ , compared with those previously reported for  $\text{NaSbW}_6 \cdot 16\text{H}_2\text{O}$ , and  $\text{NaSbW}_6$ .

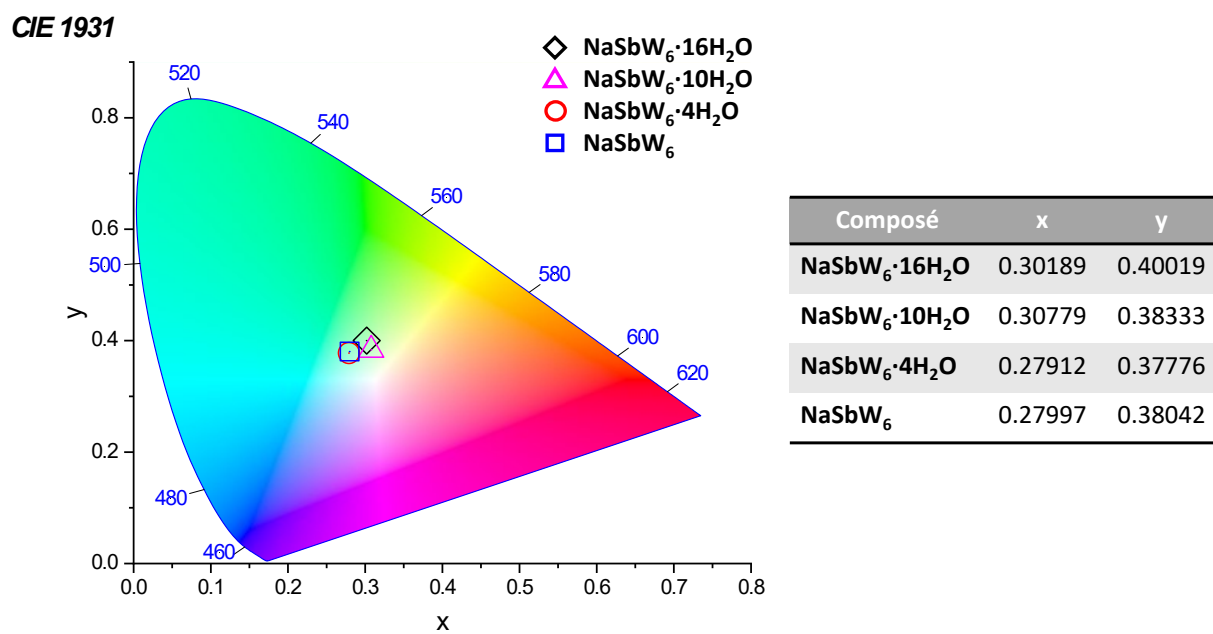



**Fig. S7** Room-temperature photoluminescence decay curves ( $\lambda_{\text{ex}} = 254 \text{ nm}$ ) monitored at 513 nm for  $\text{NaSbW}_6 \cdot 10\text{H}_2\text{O}$  (■), and  $\text{NaSbW}_6 \cdot 4\text{H}_2\text{O}$  (●). The  $I = f(t)$  plots have been properly fitted by a monoexponential law (red lines). Extracted decay times ( $\tau$ ) and regression coefficients ( $R^2$ ) are indicated.

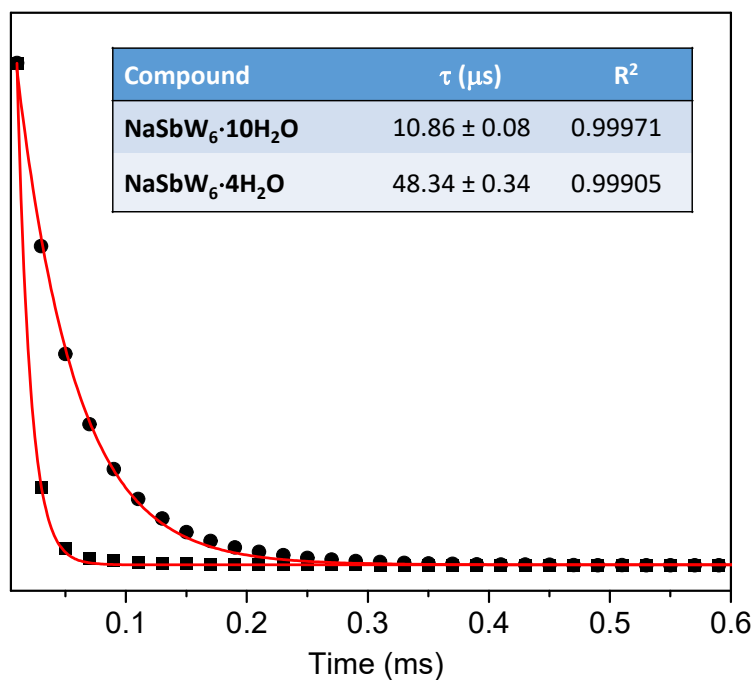

**Fig. S8** Room-temperature PL spectra (recorded upon excitation at 254 nm) of  $\text{NaSbW}_6$  at different RH levels compared with that of the  $\text{NaSbW}_6 \cdot 16\text{H}_2\text{O}$  reference.

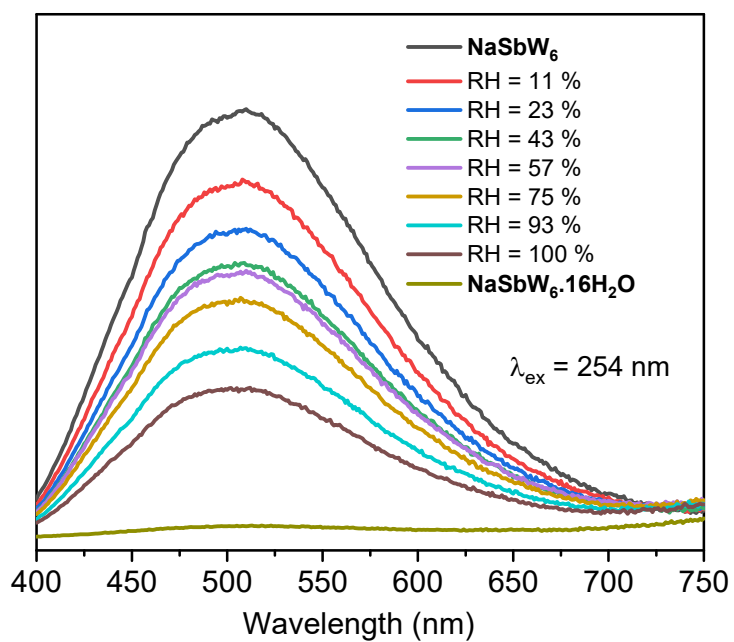

**Table S2** Crystallographic data of **NaSbW<sub>6</sub>·16H<sub>2</sub>O**, **NaSbW<sub>6</sub>·10H<sub>2</sub>O**, and **NaSbW<sub>6</sub>**.

| Compound                                | <b>NaSbW<sub>6</sub>·16H<sub>2</sub>O</b> <sup>S1</sup>          | <b>NaSbW<sub>6</sub>·10H<sub>2</sub>O</b>                        | <b>NaSbW<sub>6</sub></b>                         |
|-----------------------------------------|------------------------------------------------------------------|------------------------------------------------------------------|--------------------------------------------------|
| Formula                                 | Na <sub>7</sub> SbW <sub>6</sub> O <sub>40</sub> H <sub>32</sub> | Na <sub>7</sub> SbW <sub>6</sub> O <sub>34</sub> H <sub>10</sub> | Na <sub>7</sub> SbW <sub>6</sub> O <sub>24</sub> |
| M [g·mol <sup>-1</sup> ]                | 2058                                                             | 1951                                                             | 1770                                             |
| Crystal system                          | triclinic                                                        | triclinic                                                        | trigonal                                         |
| Space group                             | <i>P</i> -1                                                      | <i>P</i> -1                                                      | <i>R</i> -3                                      |
| a [Å]                                   | 8.6026(5)                                                        | 7.3865(1)                                                        | 10.53600(18)                                     |
| b [Å]                                   | 10.1939(6)                                                       | 10.2513(1)                                                       | 10.53600(18)                                     |
| c [Å]                                   | 11.4666(5)                                                       | 11.3135(2)                                                       | 16.1942(5)                                       |
| α [°]                                   | 106.096(4)                                                       | 73.9061(11)                                                      | 90                                               |
| β [°]                                   | 91.180(4)                                                        | 71.5584(10)                                                      | 90                                               |
| γ [°]                                   | 107.231(5)                                                       | 76.483(1)                                                        | 120                                              |
| V [Å <sup>3</sup> ]                     | 916.97(9)                                                        | 770.75(2)                                                        | 1556.84(6)                                       |
| Z                                       | 1                                                                | 1                                                                | 3                                                |
| ρ <sub>calcd</sub> [g/cm <sup>3</sup> ] | 3.727                                                            | 4.203                                                            | 5.663                                            |
| T [K]                                   | 130.15                                                           | 293.15                                                           | 303.15                                           |

## Reference

S1 A. A. Mukhacheva, M. R. Ryzhikov, T. Asanova, T. S. Sukhikh, N. B. Kompankov, V. V. Yanshole, A. S. Berezin, A. L. Gushchin, P. A. Abramov and M. N. Sokolov, *Curr. Inorg. Chem.*, 2017, **7**, 4–7.
